# Supplementary material for: Tetracycline Antibiotics: Elucidating the Electrochemical Fingerprint and Oxidation Pathway
Source: MDPI journal article supplement (doi:10.3390/chemosensors9070187), 2021-07-20
Supplement: s1 [file s1]

**Supplementary Material**

**Tetracycline antibiotics: elucidating the electrochemical fingerprint and oxidation pathway.**

**Rocío Cánovas,<sup>1,2</sup> Nick Slegers,<sup>1,2</sup> Alexander L.N. van Nuijs,<sup>3</sup> Karolien De Wael<sup>\*,1,2</sup>**

<sup>1</sup> AXES Research Group, Bioscience Engineering Department, University of Antwerp, Groenenborgerlaan 171, 2020 Antwerp, Belgium.

<sup>2</sup> NANOlaboratory Center of Excellence, University of Antwerp, Groenenborgerlaan 171, 2020 Antwerp, Belgium.

<sup>3</sup> Toxicological Center, University of Antwerp, Universiteitsplein 1, 2610 Antwerp, Belgium

**\*Corresponding author:** Karolien De Wael (karolien.dewael@uantwerpen.be)

## Table of contents

|                                                                                     |              |
|-------------------------------------------------------------------------------------|--------------|
| <b>Materials and Methods.....</b>                                                   | <b>SM-3</b>  |
| <i>LC-QTOF-MS conditions .....</i>                                                  | SM-3         |
| <b>Tables .....</b>                                                                 | <b>SM-4</b>  |
| <i>Table S1. Maximum residue limit (MRL) for tetracyclines.....</i>                 | SM-4         |
| <i>Table S2. Summary of electrochemical biosensors.....</i>                         | SM-5         |
| <i>Table S3. Summary of electrochemical modified electrodes.....</i>                | SM-7         |
| <i>Table S4. LC-QTOF data for all four TCs and the main oxidation products.....</i> | SM-10        |
| <b>Figures .....</b>                                                                | <b>SM-11</b> |
| <i>Figure S1. Chemical structure of the tetracycline antibiotics.....</i>           | SM-11        |
| <i>Figure S2. pH screening (2 – 12) for all tetracyclines.....</i>                  | SM-12        |
| <i>Figure S3. Peak potential versus pH.....</i>                                     | SM-13        |
| <i>Figure S4. MS/MS spectra of DOXY.....</i>                                        | SM-14        |
| <i>Figure S5. HPLC–ECD chromatograms of TCs at 10 <math>\mu</math>M.....</i>        | SM-14        |
| <i>Figure S6. Electrochemical influence of the supporting electrolyte .....</i>     | SM-15        |
| <i>Figure S7. Optimization of the main parameters used in SWV.....</i>              | SM-15        |
| <i>Figure S8. Reproducibility study.....</i>                                        | SM-16        |
| <i>Figure S9. Stability study.....</i>                                              | SM-16        |
| <i>Figure S10. Output signal after the utilization of the script .....</i>          | SM-17        |
| <b>References.....</b>                                                              | <b>SM-18</b> |

## Materials and Methods

### *LC-QTOF-MS conditions Reagents*

Chromatographic separation was performed on a Luna C18 column (100 × 2.1 mm, 2.6 μm), maintained at room temperature, and using a mobile phase composed of 0.04% of formic acid in ultrapure water (A) and acetonitrile/ultrapure water (80/20, v/v) with 0.04% formic acid (B), in gradient. The gradient elution between the two solvents starts with 2% of solvent B and over the first following 13 min solvent B is linearly increasing up to 100%. From the 13.1 min to 15 min the eluent solely consist of solvent B, after that, at 15.1 min, the eluents re-equilibrate and come back to the initial 2% solvent B at the 19 min to re-calibrate the column. The flow rate and the injection volume were set at 0.3 mL/min and 1 μL, respectively. The instrument was operated in the 2 GHz (extended dynamic range) mode, which provides a full width at half-maximum (FWHM) resolution of approximately 4700 at  $m/z$  118 and 10 000 at  $m/z$  922. Positive polarity electrospray ionization (ESI) mode was used under the following specific conditions: gas temperature 300 °C; gas flow 8 L/min; nebulizer pressure 40 psi; sheath gas temperature 350 °C; sheath gas flow 11 L/min. Capillary and fragmentary voltages were set to 4000 and 135 V, respectively. A reference calibration solution (provided by Agilent Technologies) was continuously sprayed into the ESI source of the QTOF-MS system. The ions selected for recalibrating the mass axis, ensuring the mass accuracy throughout the run were  $m/z$  121.0508 and 922.0097. The QTOF-MS device was acquiring from  $m/z$  50 to 1000 in MS mode. Data-dependent acquisition mode (auto-MS/MS) was applied using two different collision energies (10 and 20 eV) for the fragmentation of the selected parent ions. The maximum number of precursors per MS cycle was set to 4 with minimal abundance of 2500 counts. In addition, precursor ions were excluded after every spectrum and released after 0.2 min.

## Tables

**Table S1.** Maximum residue limit (MRL) for tetracyclines in animal tissues (COMMISSION REGULATION (EU) No 37/2010)

| Antibiotics       | Marker residue                      | Animal Species             | MRL                    | Target Tissues  | Other Provisions                                                                                                                             |
|-------------------|-------------------------------------|----------------------------|------------------------|-----------------|----------------------------------------------------------------------------------------------------------------------------------------------|
| Tetracycline      | Sum of parent drug and its 4-epimer | All food-producing species | 100 µg/kg              | Muscle          | For fin fish the muscle MRL relates to 'muscle and skin in natural proportions'.<br>MRLs for liver and kidney do not apply to fin fish.      |
|                   |                                     |                            | 300 µg/kg              | Liver           |                                                                                                                                              |
|                   |                                     |                            | 600 µg/kg              | Kidney          |                                                                                                                                              |
|                   |                                     |                            | 100 µg/kg              | Milk            |                                                                                                                                              |
|                   |                                     |                            | 200 µg/kg              | Eggs            |                                                                                                                                              |
| Doxycycline       | Doxycycline                         | Bovine                     | 100 µg/kg              | Muscle          | Not for use in animals from which milk is produced for human consumption.                                                                    |
|                   |                                     |                            | 300 µg/kg              | Liver           |                                                                                                                                              |
|                   |                                     |                            | 600 µg/kg              | Kidney          |                                                                                                                                              |
|                   |                                     | Porcine, poultry           | 100 µg/kg              | Muscle          | Not for use in animals from which eggs are produced for human consumption.                                                                   |
|                   |                                     |                            | 300 µg/kg              | Skin & fat      |                                                                                                                                              |
|                   |                                     |                            | 300 µg/kg<br>600 µg/kg | Liver<br>Kidney |                                                                                                                                              |
| Oxytetracycline   | Sum of parent drug and its 4-epimer | All food-producing species | 100 µg/kg              | Muscle          | For fin fish the muscle MRL relates to 'muscle and skin in natural proportions'.<br>MRLs for fat, liver and kidney do not apply to fin fish. |
|                   |                                     |                            | 300 µg/kg              | Liver           |                                                                                                                                              |
|                   |                                     |                            | 600 µg/kg              | Kidney          |                                                                                                                                              |
|                   |                                     |                            | 100 µg/kg              | Milk            |                                                                                                                                              |
|                   |                                     |                            | 200 µg/kg              | Eggs            |                                                                                                                                              |
| Chlortetracycline | Sum of parent drug and its 4-epimer | All food-producing species | 100 µg/kg              | Muscle          | For fin fish the muscle MRL relates to 'muscle and skin in natural proportions'.<br>MRLs for liver and kidney do not apply to fin fish.      |
|                   |                                     |                            | 300 µg/kg              | Liver           |                                                                                                                                              |
|                   |                                     |                            | 600 µg/kg              | Kidney          |                                                                                                                                              |
|                   |                                     |                            | 100 µg/kg              | Milk            |                                                                                                                                              |
|                   |                                     |                            | 200 µg/kg              | Eggs            |                                                                                                                                              |

\* According to Article 14(7) of Regulation (EC) No 470/2009

**NOTE:** the UE data differs from the U.S. Food and Drug Administration (FDA) that had set the MRLs for milk (0.4 mg kg<sup>-1</sup>), fat (12 mg kg<sup>-1</sup>), liver (6 mg kg<sup>-1</sup>), and muscle (2 mg kg<sup>-1</sup>) samples to control the levels of TCs satisfying the security value.[1–3]

**Table S2.** Summary of electrochemical biosensors based on aptamers, antibodies, molecular imprinted polymers and enzyme-linked immunoassays for tetracyclines (TCs) detection.

| REF  | TCs                | Detection method                  | Electrode                             | Modification                                                                                                                    | LR                     | LOD               | Recovery (%)   |
|------|--------------------|-----------------------------------|---------------------------------------|---------------------------------------------------------------------------------------------------------------------------------|------------------------|-------------------|----------------|
| [4]  | TET                | PEC<br>CV, EIS                    | Indium-Tin<br>Oxides (ITO)            | Aptamer TPP doped PFBT<br>polymer quantum dots                                                                                  | 0.1 – 1000 nM          | 0.26 nM           | 96 – 104       |
| [5]  | TET                | PEC                               | FTO glass                             | Aptamer with zirconia (ZrO <sub>2</sub> )<br>modified graphitic carbon<br>nitride (g-C <sub>3</sub> N <sub>4</sub> ) nanosheets | 50 – 150 nM            | 8.7 nM            | --             |
| [6]  | OXY                | DPV                               | GCE                                   | Aptamer covalently-bound via<br>diazonium coupling reaction                                                                     | 2.17 nM – 0.2 mM       | 0.5 nM            | 87 – 99.3      |
| [7]  | TET                | CV<br>EIS<br>DPV                  | Gold electrode                        | Aptamer linked to CNQDs and<br>AgNPs nanocomposite                                                                              | 1 nM – 0.1mM           | 0.26 nM           | 96 – 103       |
| [8]  | TET                | DPV<br>EIS                        | Gold electrode                        | TET aptamer modified with<br>Ferrocene based on $\beta$ -<br>cyclodextrin subject-object<br>competition model                   | 0.01 – 100 nM          | 0.008 nM          | 96 – 104.4     |
| [9]  | TET                | DPV                               | modified<br>carbon paste<br>electrode | magnetic nanoparticles coated<br>with MIP                                                                                       | 0.08 – 80 $\mu$ M      | 0.02 $\mu$ M      | 78.5 – 101.6   |
| [10] | OXY<br>CHL<br>DOXY | CV<br>DPV                         | GCE                                   | BMMIPs using Zein as<br>crosslinker and Fe <sub>3</sub> O <sub>4</sub> particles                                                | 0.025–500 $\mu$ g/mL   | 0.025 $\mu$ g/mL  | 83.73 – 95.97  |
| [11] | OXY                | CV<br>DPV                         | paper-based<br>printed elect.         | capture anti-OXY antibody and<br>OXY-conjugated BSA                                                                             | 2.17 – 434 nM          | 0.7 nM            | --             |
| [12] | TET                | EIS                               | Gold electrode                        | antibody- terminated thiol<br>layer self-assembled                                                                              | 6.27 – 0.56 nF $\mu$ M | 28 nM             | 98.5 – 106.9   |
| [13] | TET<br>DOXY        | CV<br>EIS                         | gold-coated<br>silicon<br>electrode   | ultrathin PTA film modified<br>with polyclonal antibodies                                                                       | 1 to 200 $\mu$ g/L     | 0.01 $\mu$ g/L    | 96 – 102       |
| [14] | TET                | LC-based aptasensor               | -- (glass<br>substrate)               | label-free LC aptasensor                                                                                                        | 0.5–500 pM             | 0.5 pM            | 95.6 – 108.7   |
| [15] | TET                | EIS<br>CV                         | SPCE                                  | Anti-TET aptamer + prior<br>pretreatment (LSV: 1 – 1.5V,<br>H <sub>2</sub> SO <sub>4</sub> 0.5M)                                | 0.11 – 45 nM           | 78.8 pM           | 87.8 – 97      |
| [16] | TET                | EIS and PEC                       | ITO                                   | MCH/aptamer/AuInCN                                                                                                              | 0.01–500 nM            | 3.3 pM            | 99.6 – 110.6   |
| [17] | TET                | DPV                               | SPCE                                  | MIOPPy and AuNPs                                                                                                                | 1 – 20 $\mu$ M         | 0.65 $\mu$ M      | 92.2 – 105     |
| [18] | TET                | CV, EIS, DPV                      | GCE                                   | poly (L-glutamic<br>acid)/MWCNTs for<br>immobilization of anti-TET<br>aptamer                                                   | 0.1 fM – 1 $\mu$ M     | 0.037 fM          | 94 – 95        |
| [19] | TET                | Fluorescence<br>spectrophotometer | --                                    | Aptamer + luminescence of<br>SYBR Green I                                                                                       | 11.3 – 56.3 $\mu$ M    | 0.23 $\mu$ M      | 98.98 – 104.67 |
| [20] | TET                | EIS and DPV                       | GCE                                   | MoS <sub>2</sub> -TiO <sub>2</sub> @Au composite +<br>thiolated DNA aptamer + biotin<br>cDNA + avidin HRP                       | 0.15 nM – 6 $\mu$ M    | 0.05 nM           | 90 – 97        |
| [21] | TET                | PEC                               | ITO                                   | aptasensor based on cerium<br>doped CdS modified graphene<br>(G)/BiYWO <sub>6</sub>                                             | 0.45 nM- 2.25 $\mu$ M  | 0.022 nM          | 103.8 – 105.3  |
| [22] | TET                | SPR                               | CM5 chip                              | Anti-TET aptamer on top of a<br>DNA tetrahedron<br>nanostructure                                                                | 0.01–1000 $\mu$ g/kg   | 0.0069 $\mu$ g/kg | 80.2 – 114.3   |
| [23] | TET                | DPV                               | SPCEs                                 | APT 1: Fc and AuNPs<br>nanocomposite<br>APT 2: CNFs and AuNPs<br>nanocomposite                                                  | 22.5pM –2.25 $\mu$ M   | 0.74 nM           | 96 – 104       |
| [24] | TET                | CV                                | SPE                                   | Aptasensor with ionic Liquid<br>and Fe <sub>3</sub> O <sub>4</sub> MNPs                                                         | 1 nM – 10 mM           | 1 nM              | 84 – 92        |
| [25] | TET                | SWCSV                             | GCE                                   | SbFE                                                                                                                            | 0.40 – 3.00 $\mu$ M    | 0.15 $\mu$ M      | 91.5 – 109.7   |

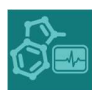

|      |                                                                           |                                                                            |                                           |                                                                                                              |                                                                                                                    |                                                                                                         |                                                |
|------|---------------------------------------------------------------------------|----------------------------------------------------------------------------|-------------------------------------------|--------------------------------------------------------------------------------------------------------------|--------------------------------------------------------------------------------------------------------------------|---------------------------------------------------------------------------------------------------------|------------------------------------------------|
| [26] | TET                                                                       | EIS                                                                        | Gold electrode                            | label-free aptasensor                                                                                        | 22.5nM – 6.75µM                                                                                                    | 22.5 nM                                                                                                 | 88.1 – 94.0                                    |
| [27] | TET                                                                       | CV, EIS, DPV                                                               | GCE                                       | graphene oxide nanosheets + chemical immobilized aptamer                                                     | 0.1 pM to 10 µM                                                                                                    | 29 fM                                                                                                   | 95 – 97                                        |
| [28] | TET                                                                       | DPV                                                                        | Gold electrode                            | MNPs + CHI linker + Ab monoclonal                                                                            | 0.18 – 2.25 nM                                                                                                     | 72.2 pM                                                                                                 | 95.9 – 108                                     |
| [29] | TET                                                                       | DPV and CV                                                                 | SPCE                                      | Alginate film containing reduced graphene oxide and magnetite nanoparticles + aptamer                        | 1 nM – 5 µM                                                                                                        | 0.6 nM                                                                                                  | --                                             |
| [30] | TET                                                                       | <sup>A</sup> EIS<br><sup>B</sup> DPV                                       | CPEs                                      | <sup>a</sup> CPE/OA/anti-TET <i>versus</i> <sup>b</sup> MBCPE/Fe <sub>3</sub> O <sub>4</sub> NPs/OA/anti-TET | <sup>Aa</sup> 1pM – 0.1 µM<br><sup>Ba</sup> 0.1nM–0.1 µM<br><sup>Ab</sup> 100pM – 1µM<br><sup>Bb</sup> 1 pM – 1 µM | <sup>Aa</sup> 0.3 pM<br><sup>Ba</sup> 29 pM<br><sup>Ab</sup> 3.8 fM<br><sup>Bb</sup> 0.31 pM<br>0.45 nM | 97–104 Serum<br>95 – 96 Honey<br>97 – 103 Milk |
| [31] | TET<br>(DOXY)                                                             | CV characterization<br>DPV measurement                                     | SPGE                                      | M-shape structure of aptamer (Apt)-CSs complex                                                               | 1.5 nM – 3.5 µM                                                                                                    | 0.74 nM milk<br>0.71 nM Ser                                                                             | 93.1–103.8 ser                                 |
| [32] | TET                                                                       | AdSDPV                                                                     | Modified carbon paste electrode           | carbon paste modified with 2.6% (w/w) of MWCNT-COOH and 3.1% (w/w) of GO                                     | 20 – 310 µM                                                                                                        | 0.36 µM                                                                                                 | 92 – 103                                       |
| [33] | TET                                                                       | CV and EIS                                                                 | GCE                                       | AuNPs + anti-TET aptamer + MB                                                                                | 0.1nM – 1mM                                                                                                        | 4.2 pM                                                                                                  | 96 – 108                                       |
| [34] | TET                                                                       | PEC<br>EIS                                                                 | F-doped SnO <sub>2</sub> conducting glass | Graphitic Carbon Nitride Sensitized with CdS Quantum Dots + aptamer                                          | 10–250 nM                                                                                                          | 5.3 nM                                                                                                  | 99.1 – 101.1                                   |
| [35] | TET                                                                       | Colorimetric assay                                                         | --<br>(Cuvette)                           | Aptasensor with cysteamine-stabilized AuNPs                                                                  | 0.45nM – 4.5 µM                                                                                                    | 87.7 nM                                                                                                 | 91.28 –100.87                                  |
| [36] | TET<br>(DOXY)                                                             | Absorbance, colorimetric assay                                             | --<br>(Microplate reader)                 | Aptasensor THMS and AuNPs                                                                                    | 0.3 – 10 nM                                                                                                        | 266 pM                                                                                                  | --                                             |
| [37] | TET                                                                       | Absorbance, direct competitive enzyme-linked aptamer assay (dc-ELAA)       | --<br>(Plate)                             | ssDNA aptamer                                                                                                | 0.225nM–2.25µM                                                                                                     | 0.22 nM                                                                                                 | 92.09 – 109.7                                  |
| [38] | TET                                                                       | Immunoassay                                                                | GCE                                       | AuNPs + monoclonal Ab onto CdS nanoclusters                                                                  | 22.5pM–112.5µM                                                                                                     | 0.016 pM                                                                                                | 88 – 107                                       |
| [39] | TET                                                                       | Absorbance, Indirect competitive enzyme-linked aptamer assay (ic-ELAA)     | --<br>(Microplate reader)                 | ssDNA aptamer                                                                                                | 22.5 – 225nM                                                                                                       | 21.6 nM                                                                                                 | 95.38 –108.07                                  |
| [40] | TET                                                                       | EIS<br>DPV                                                                 | Gold electrode                            | Covalent attachment of amino-modified APT                                                                    | 11.3nM – 11.3µM                                                                                                    | 2.25 nM                                                                                                 | 90 – 95.7                                      |
| [41] | TET                                                                       | DPV                                                                        | GCE                                       | PB-CHI-glutaraldehyde system + AuNPs + anti-TET aptamer                                                      | 1 nM – 10 mM                                                                                                       | 0.32 nM                                                                                                 | 92 – 106                                       |
| [42] | TET                                                                       | LSV                                                                        | Gold electrode                            | platinum-catalyzed HER with anti-TC antibody                                                                 | 0.112– 225 nM                                                                                                      | 0.013 nM                                                                                                | 86 – 110 H<br>95.6 – 118 M 98 – 106.7 P        |
| [43] | TET<br>TET<br>OXY<br>CHL<br>DOXY<br>TET,<br>OXY,<br>DOXY,<br>CHL,<br>DEME | Amperometry<br>Competitive immunoassay using TC-HRP on antiTC-modified MBs | SPCE                                      | ProtG-MBs + anti-TET Ab + HQ mediator and H <sub>2</sub> O <sub>2</sub> detection                            | 12.5–676.2 ppb<br>17.8–189.6ng/mL<br>4–242.3 ng/mL<br>144.2–2001.9<br>2.6–234.9                                    | 3.9ppb(ng/mL)<br>1.9"/8.9ng/mL<br>1.2 ng/mL<br>66.8 ng/mL<br>0.7 ng/mL                                  | 99                                             |
| [44] | DOXY,<br>CHL,<br>DEME                                                     | ELISA                                                                      | SPCE                                      | AuNPs conjugated with polyclonal anti-TET Ab (TMB/H <sub>2</sub> O <sub>2</sub> + TET-HRP)                   | 0 – 250 ppb                                                                                                        | 10 ppb                                                                                                  | 70 – 95                                        |
| [45] | TET                                                                       | EIS                                                                        | PS chip                                   | Aptamer PS biosensor                                                                                         | 2.1 – 62.4 nM                                                                                                      | 2 nM                                                                                                    | --                                             |
| [46] | TET                                                                       | CV<br>DPV                                                                  | GCE                                       | Ethanolamine + TET aptamer + MWCNTs-COOH                                                                     | 10 nM – 50 µM                                                                                                      | 5 nM                                                                                                    | 88 – 96                                        |
| [47] | TET                                                                       | CV<br>(EIS)                                                                | GCE                                       | MIP CNT-AuNPs                                                                                                | 0.1– 40 mg/L                                                                                                       | 0.04 mg/L                                                                                               | --                                             |
| [48] | TET<br>OXY                                                                | CV<br>SWV                                                                  | SPGE                                      | Biotinylated ssDNA aptamer interaction with streptavidin                                                     | 10 nM – 10 µM<br>--                                                                                                | 10 nM                                                                                                   | --                                             |



|      |                   |       |                      |                    |                   |            |          |
|------|-------------------|-------|----------------------|--------------------|-------------------|------------|----------|
|      |                   | DOXY  |                      | --                 |                   |            |          |
| [49] | TET               | ELISA | --<br>(Immuno plate) | (biotin-avidin)    | 0.316 – 316 nM    | 10 nM      | ~ 90     |
| [50] | TET<br>OXY<br>CHL | ELISA | --                   | anti-TC antibodies | 0.1– 100 µg/mL    | 0.01 µg/mL | 74 – 116 |
| [3]  | TET               | ELISA | --                   | Haptens            | 1.15 – 38.9 ng/mL | 0.4 ng/mL  | 79 – 108 |

TET: tetracycline, DOXY: doxycycline, OXY: oxytetracycline, CHL: chlortetracycline, MNC: minocycline, DEME: demeclocycline, PEC: photoelectrochemical; TPP: tetraphenyl porphyrin; FTO: fluorine doped tin oxide; EIS: electrochemical impedance spectroscopy, CV: cyclic voltammetry, DPV: differential pulse voltammetry, BSA: bovine serum albumin, PTA: polytyramine, LSV: linear sweep voltammetry, SPR: surface plasmon resonance, SPCE: screen-printed carbon electrode, GCE: glassy carbon electrode, SPGE: screen-printed gold electrode, CPEs: carbon paste electrodes, SWCSV: square-wave cathodic stripping voltammetry, Ab: antibody; BMMIPs: biocompatible magnetic molecularly imprinted polymers; AgNPs: silver nanoparticles; CNQDs: carbon nitride quantum dots; LC: liquid crystal; MCH: mercaptohexanol; AuInCN; plasmon Au coupling with MOF-derived In<sub>2</sub>O<sub>3</sub>@g-C<sub>3</sub>N<sub>4</sub> nanoarchitectures; MIOppy: molecularly imprinted overoxidized polypyrrole, Fc: ferrocene AuNPs: gold nanoparticles, CNFs: carbon nanofibers, SbFE: antimony film electrode, MNPs: carboxyl-Fe<sub>3</sub>O<sub>4</sub> nanoparticle, CHI: chitosan, MB: methylene blue, THMS: triple-helix molecular switch, HER: hydrogen evolution reaction, HQ: hydroquinone, H<sub>2</sub>O<sub>2</sub>: hydrogen peroxide, PS: nanoporous silicon, ELISA: enzyme-linked immunosorbent assay.

**Table S3.** Summary of electrochemical approaches based on modified electrodes for tetracycline determination.

| REF  | TCs                       | Detection Method               | Electrode                           | Modification                                              | LR                                           | LOD                              | Recovery (%)                   |
|------|---------------------------|--------------------------------|-------------------------------------|-----------------------------------------------------------|----------------------------------------------|----------------------------------|--------------------------------|
| [51] | TET                       | EIS                            | pencil graphite electrode           | reduced graphene oxide and AuNPs                          | 0.1 fM – 1 µM                                | 30 aM                            | 92 – 102                       |
| [52] | TET<br>DOXY<br>OXY<br>CHL | AdTDPV                         | Graphene-based SPE                  | Electrochemically reduced graphene oxide                  | 20 – 80 µM                                   | 12 µM                            | 94 – 110                       |
| [53] | TET                       | CV<br>DPV<br>EIS               | GCE                                 | zirconium ferrate doped silver phosphate sensor           | 10 – 90 nM                                   | 6.38 nM                          | --                             |
| [54] | DEME                      | SW-AdSV                        | BDDE                                | unmodified                                                | 10 – 90 and 1 – 50 µg/mL                     | 0.24 – 1.17 µg/mL                | 103 – 109                      |
| [55] | TET                       | CV and EIS<br>SW-AdSV          | GCE                                 | poly(malachite green)                                     | 5 – 100 µM                                   | 1.6 µM                           | 98.49 – 99.78                  |
| [56] | TET                       | CV and EIS<br>polyclonal Ab-TC | Gold microelectrodes                | TC immobilized in the µWE by 3 # methods, Py/Py-COOH/MNPs | 0.22 pM – 2.25 nM                            | 2.7 pM                           | --                             |
| [57] | TET                       | DPV                            | 60% graphite-PU composite electrode | Deproteinization and extraction of the antibiotic by SPE  | 3.8 – 38 µM peak1<br>3.8 – 19 µM peak2       | 2.6 µM                           | 83 – 99 (bov)<br>83 – 97 (bre) |
| [58] | TET<br>(UA)               | CV<br>DPV                      | GCE                                 | p-Mel film on ERGO                                        | 5 – 225 µM                                   | 2.2 µM                           | 99 – 99.6<br>99.7 – 99.9       |
| [59] | TET                       | CV<br>DPV                      | GCE                                 | PtNPs                                                     | 9.99 – 44.01 µM                              | 4.28 µM                          | --                             |
| [60] | TET<br>OXY                | DPV                            | Graphite composite electrode        | 60% graphite-PU composite                                 | 3.8–38 µM<br>3.8–28.5 µM                     | 2.3 µM<br>1.6 µM                 | 98<br>96 – 97                  |
| [61] | TET                       | DPV, CV and EIS                | GCE                                 | Fe/Zn–MMT catalyst                                        | 0.3 – 52 µM                                  | 10.7 nM                          | 97.2 – 103                     |
| [62] | TET                       | SWV<br>Urine, serum, milk      | SPGE                                | SAM of Cys on AuNP                                        | 4 – 800 µM U<br>4 – 700 µM S<br>4 – 700 µM M | 0.4 µM U<br>0.5 µM S<br>0.5 µM M | 93 U<br>107 S<br>113 M         |
| [63] | TET<br>(SA)               | SWV                            | SPdCEs (dual)                       | ProtG-4-ABA film grafted + HRP and HQ                     | 6.4 – 385 nM                                 | 1.93 nM                          | 98 ± 6                         |
| [64] | TET                       | DPV                            | GPU electrode                       | GPU composite                                             | 4 – 40 µM                                    | 2.8 µM                           | 92.6 – 100                     |

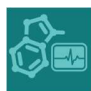

|      |                                |                                                                |                                             |                                                                       |                                                                                                       |                        |                        |
|------|--------------------------------|----------------------------------------------------------------|---------------------------------------------|-----------------------------------------------------------------------|-------------------------------------------------------------------------------------------------------|------------------------|------------------------|
| [65] | TET                            | CV                                                             | Gold microelectrode (GME)                   | Electrodeposition of gold colloids on the tungsten tip                | 2.08 – 20.8 $\mu$ M                                                                                   | 187 nM                 | --                     |
| [66] | MNC                            | LC + SPE                                                       | Polycrystalline gold electrode              | --                                                                    | Under IPAD:                                                                                           | 50 – 150 nM            | 70 – 118               |
|      | OXY                            | Amperometric detector                                          |                                             |                                                                       | 0.25 – 263 mg/L                                                                                       |                        |                        |
|      | TET                            | operating under: DC                                            |                                             |                                                                       | Under DC:                                                                                             |                        |                        |
|      | DEME                           | (direct amperometric detection) and IPAD                       |                                             |                                                                       | 0.04 – 7.1 mg/L                                                                                       |                        |                        |
| [67] | CHL                            | (complex multiple potential waveform)                          | GCE                                         | Ionic liquid-MWCNT paste film coating                                 | 0.11 – 22 $\mu$ M                                                                                     | 30 nM                  | 91 – 105               |
|      | DOXY                           |                                                                |                                             |                                                                       |                                                                                                       |                        |                        |
|      |                                |                                                                |                                             |                                                                       |                                                                                                       |                        |                        |
|      |                                |                                                                |                                             |                                                                       |                                                                                                       |                        |                        |
| [68] | TET                            | LSV                                                            | SPGE                                        | --                                                                    | 1 – 500 $\mu$ M                                                                                       | 0.96 $\mu$ M           | 83.4 – 99.3            |
|      | OXY                            | FIA + CV                                                       |                                             |                                                                       | 5 – 50 $\mu$ M                                                                                        | 0.35 $\mu$ M           | 85.9 – 99.2            |
|      | CHL                            | Dc amperometry                                                 |                                             |                                                                       | 1 – 500 $\mu$ M                                                                                       | 0.58 $\mu$ M           | 88.7 – 100.3           |
|      | TET                            |                                                                |                                             |                                                                       | 2.5 – 100 $\mu$ M                                                                                     | 0.12 $\mu$ M           | 99                     |
| [69] | OXY                            | CV                                                             | GCE                                         | MWCNTs                                                                | 2.5 – 100 $\mu$ M                                                                                     | 0.09 $\mu$ M           | 95                     |
|      | DOXY                           | HPLC-ED                                                        |                                             |                                                                       | 1 – 100 $\mu$ M                                                                                       | 0.44 $\mu$ M           | 93                     |
|      | CHL                            |                                                                |                                             |                                                                       | 1 – 100 $\mu$ M                                                                                       | 0.31 $\mu$ M           | 87                     |
|      |                                |                                                                |                                             |                                                                       | 0.1 – 15 mg/L                                                                                         | 0.07 mg/L              | 102.5                  |
| [70] | DEME                           | Multi IPAD + HPLC                                              | Gold electrode (Detection cell)             | --                                                                    | 3.1 $\mu$ M                                                                                           | 0.10–0.17              | 117                    |
|      | OXY                            |                                                                |                                             |                                                                       | 0.1 – 15 mg/L                                                                                         | 0.08                   | 111                    |
|      | TET                            |                                                                |                                             |                                                                       | 0.1 – 15 mg/L                                                                                         | 0.05                   |                        |
|      |                                |                                                                |                                             |                                                                       | 0.05–100 ng/ml                                                                                        | 0.01                   | 83.3 – 102.5           |
| [71] | OXY                            | CV                                                             | BDD and GCE                                 | Ni-DIA                                                                | 0.1–201 $\mu$ M                                                                                       | 0.02–0.10              | 85.9 – 97              |
|      | TET                            | HPLC                                                           |                                             |                                                                       | 0.05 –100                                                                                             | 0.01                   | 86 – 97.9              |
|      | CHL                            |                                                                |                                             |                                                                       | 0.1 –100                                                                                              | 0.05                   | 88.4 – 103.7           |
|      | DOXY                           |                                                                |                                             |                                                                       | 0.1 –100                                                                                              | 0.05                   |                        |
| [72] | TET                            | CV,                                                            | BDDE                                        | Anodized BDD thin film electrode                                      | 0.1 – 100 $\mu$ g/mL                                                                                  | 0.05 $\mu$ g/mL        | 70.8 – 96              |
|      | CHL                            | HPLC + PAD                                                     |                                             |                                                                       |                                                                                                       | 0.1 $\mu$ g/mL         |                        |
|      | DOXY                           |                                                                |                                             |                                                                       |                                                                                                       | 0.1 $\mu$ g/mL         |                        |
|      | OXY                            |                                                                |                                             |                                                                       |                                                                                                       | 0.05 $\mu$ g/mL        |                        |
| [73] | TET                            | Indirect potentiometric detection through microbial inhibition | CO <sub>2</sub> sensor                      | --                                                                    | 50 – 100 $\mu$ g/L<br>348 to 6600 ppm                                                                 | 25 $\mu$ g/L           | --                     |
| [74] | OXY                            | HPLC + coulometric electrode array system                      | ESA electrochemical detector (4 electrodes) | (*) samples pretreated using liquid–liquid extraction based on hexane | 0.10–2.08 $\mu$ M                                                                                     | 0.026–0.052 $\mu$ M    | 92.2 – 96.2            |
|      | TET                            |                                                                |                                             |                                                                       |                                                                                                       |                        | 89.6 – 93.9            |
|      | CHL                            |                                                                |                                             |                                                                       |                                                                                                       |                        | 88.4 – 92.9            |
|      | MTC                            |                                                                |                                             |                                                                       |                                                                                                       |                        | 92.5 – 94.4            |
| [75] | DOXY                           |                                                                | GCE                                         | Ru oxide – Ru cyanide films                                           | --                                                                                                    | 0.1 ppm                | 73 – 111               |
|      | TET                            | CV and LCEC                                                    |                                             |                                                                       |                                                                                                       | 0.1 ppm                |                        |
|      | OXY                            |                                                                |                                             |                                                                       |                                                                                                       | 0.5 ppm                |                        |
|      | CHL                            |                                                                |                                             |                                                                       |                                                                                                       | 0.5 ppm                |                        |
| [76] | DOXY                           | FI-ED                                                          | BDDE (GCE)                                  | As-deposited BDD Anodized BDD                                         | 0.1 – 50 mM (TET)                                                                                     | 10 nM                  | 99.8 %                 |
|      | OXY                            | CV                                                             |                                             |                                                                       | 0.5 – 50 mM                                                                                           |                        | 98.4 %                 |
|      | CHL                            | HV                                                             |                                             |                                                                       | (DOXY, OXY and CHL)                                                                                   |                        | 101.85 %               |
|      |                                |                                                                |                                             |                                                                       |                                                                                                       |                        | 99.87 %                |
| [77] | TET                            | CV                                                             | Acetylene black electrode                   | Ac black electrode SDS on the surface                                 | 0.12 – 60 $\mu$ M                                                                                     | 12 nM                  | 98.2 – 105             |
| [78] | DOXY                           | PAD                                                            | Au rotating disk electrode                  | --                                                                    | 1 – 100 $\mu$ M                                                                                       | 1 $\mu$ M              | 87–103                 |
|      | CHL                            | CV                                                             |                                             |                                                                       |                                                                                                       |                        | 93–109                 |
| [79] | OXY                            | FI-ED CV and SWV                                               | CFME                                        | --                                                                    | 1 – 100 $\mu$ M                                                                                       | 0.29 $\mu$ M (SWV)     | 96 (milk)<br>91 (eggs) |
| [80] | TET                            | FI + PAD CV (Au RDE)                                           | Gold rotating disk electrode                | --                                                                    | 5 $\mu$ M – 0.6 mM                                                                                    | 1 $\mu$ M              | --                     |
| [81] | TET                            | CE+CV                                                          | Hg-film $\mu$ m electrode                   | --                                                                    | 1 – 500 $\mu$ M (TET, CHL)                                                                            | 0.7 $\mu$ M (TET, CHL) | --                     |
|      | OXY                            |                                                                |                                             |                                                                       | 2.5 – 800 $\mu$ M (OXY)                                                                               | 1.5 $\mu$ M (OXY)      |                        |
|      | CHL                            |                                                                |                                             |                                                                       |                                                                                                       |                        |                        |
| [82] | CHL, DEME, DOXY, MTC, MNC, OXY | HPLC + amperometric detection (ECD) at 1.2 V                   | GCE                                         | --                                                                    | 0.1 – 50 ng/ $\mu$ L DC, MNC, OTC (0.21–104 $\mu$ M) and TC 0.5 – 50 ng/ $\mu$ L for CTC, DMC and MTC | 0.20–2.0 $\mu$ M       | 99.1 – 100.4           |





|      |           |                      |                     |                       |                      |                 |            |
|------|-----------|----------------------|---------------------|-----------------------|----------------------|-----------------|------------|
|      | TET       |                      |                     |                       |                      |                 |            |
|      | TET       | FI-ED                |                     |                       | 5.6 – 180 $\mu$ M    | 67.5 nM         | 99.6       |
|      | DOXY      | Voltammetric         |                     |                       | 5.6 – 225 $\mu$ M    | 2.07 $\mu$ M    | 101.78     |
| [83] | OXY       | characterization and | Ni-GCE              | Nickel modified       | 5.4 – 217 $\mu$ M    | 73 $\mu$ M      | 101.2      |
|      | CHL       | Flow Injection       |                     |                       | 5.2 – 208 $\mu$ M    | 3.78 $\mu$ M    | 98.6       |
|      |           | Detection            |                     |                       |                      |                 |            |
|      | OXY       | CV                   | GCE                 | Pretreatment in PB    | 0.2 – 400 ng         | 0.2 ng          | --         |
| [84] | TET       | DPV                  | Pretreated (PGCE)   | +1.8 V 5min and -1.2  | 0.2 – 400 ng         | 0.2 ng          | --         |
|      | DOXY      | LCEC                 |                     | V 10 seconds          | 4 ng – 2 $\mu$ g     | 4 ng            | --         |
|      | CHL       |                      |                     |                       | 1.2 ng – 1.6 $\mu$ g | 1.2 ng          | --         |
|      |           | DPP                  |                     |                       |                      |                 |            |
| [85] | OXY       | Urine and human      | DME                 | --                    | 6.5 – 98 $\mu$ M U   | 5.5 $\mu$ M for | 80 % (U)   |
|      |           | serum                |                     |                       | 9.5 – 1200 $\mu$ M S | both fluids     | 85 % (S)   |
|      |           |                      |                     |                       |                      |                 |            |
| [86] | TET       | FI Amperometric Det. | three-electrode     | detector based on ion | 2 – 200 $\mu$ M      | 20 ng           | --         |
|      | OXY       |                      | thin-layer flow-    | transfer across a     | 5 – 300 $\mu$ M      | 50 ng           | --         |
|      |           |                      | through cell        | water - solidified    |                      |                 |            |
|      |           |                      |                     | nitrobenzene          |                      |                 |            |
|      |           |                      |                     |                       |                      |                 |            |
| [87] | TET HCl   |                      | Old capillary       |                       |                      |                 |            |
|      | with      |                      | mercury drops       | --                    | --                   | --              | 99 – 102.3 |
|      | Anhydrous | DPP                  | (Taccussel PRG      |                       |                      |                 |            |
|      | s TET     |                      | five-pulse          |                       |                      |                 |            |
|      |           |                      | polarograph)        |                       |                      |                 |            |
| [88] | OXY       | DPASV                | HMDE (hanging       | --                    | 5 nM – 100 $\mu$ M   | 2 nM            | --         |
|      |           |                      | mercury drop        |                       |                      |                 |            |
|      |           |                      | electrode)          |                       |                      |                 |            |
| [89] | OXY       | CV                   | --                  | --                    | 10 – 100 $\mu$ g/mL  | 5 $\mu$ g/mL    | --         |
|      |           | LCS-CP               |                     |                       |                      |                 |            |
|      |           |                      |                     |                       |                      |                 |            |
|      | TET, RTC, |                      |                     |                       |                      |                 |            |
|      | DEME,     |                      |                     |                       |                      |                 |            |
|      | MNC,      |                      |                     |                       |                      |                 |            |
|      | MTC,      |                      |                     |                       |                      |                 |            |
|      | DOXY,     |                      |                     |                       |                      |                 |            |
| [90] | LMC       | CV                   | Pt/Au rotating disk | --                    | --                   | 5 mM            | --         |
|      |           | Acetate buffer,      | electrodes          |                       |                      |                 |            |
|      |           | pH 4 and pH 5.6      |                     |                       |                      |                 |            |

TET: tetracycline, DOXY: doxycycline, OXY: oxytetracycline, CHL: chlortetracycline, DEME: demeclocycline, MNC: minocycline, MTC: methacycline, LMC: lymecycline, RTC: roletetracycline, AdTDPV: adsorptive transfer stripping differential pulse voltammetry; EIS: electrochemical impedance spectroscopy, CV: cyclic voltammetry, DPV: differential pulse voltammetry, LSV: linear sweep voltammetry, SPR: surface plasmon resonance, SPE: screen printed electrode; SPCE: screen-printed carbon electrode, GCE: glassy carbon electrode, SPGE: screen-printed gold electrode, SWCSV: square-wave cathodic stripping voltammetry, Ab: antibody; SW-AdSV: square wave adsorptive stripping voltammetry, BDDE: boron-doped diamond electrode, SPE: solid-phase extraction, pMel: polymelamine, ERGO: electrochemically reduced graphene oxide, Fe/Zn-MMT: iron/zinc cation-exchanged montmorillonite, SAM: Self-assembly monolayer, GPU: graphite polyurethane, Ni-DIA: nickel-implanted boron-doped diamond thin film electrode, SDS: sodium dodecyl sulfate, DPP: differential pulse polarography/voltammetry.

**Table S4.** LC-QTOF data for all four TCs and the three main oxidation products.

| Compounds                            | Retention time (min) | Measured $m/z$ | Theoretical $m/z$ | Error | Chemical formula                                                | Potential applied (pH 9) |        | Potential applied (pH 4) |        |
|--------------------------------------|----------------------|----------------|-------------------|-------|-----------------------------------------------------------------|--------------------------|--------|--------------------------|--------|
|                                      |                      |                |                   |       |                                                                 | 0.66 V                   | 0.85 V | 0.80 V                   | 1.00 V |
| DOXY                                 | 5.60                 | 445.1603       | 445.1605          | -0.55 | C <sub>22</sub> H <sub>24</sub> N <sub>2</sub> O <sub>8</sub>   |                          |        |                          |        |
| OXY                                  | 4.58                 | 561.1557       | 461.1555          | 0.53  | C <sub>22</sub> H <sub>24</sub> N <sub>2</sub> O <sub>9</sub>   |                          |        |                          |        |
| TET                                  | 4.72 / (4.25)        | 445.1608       | 445.1605          | 0.58  | C <sub>22</sub> H <sub>24</sub> N <sub>2</sub> O <sub>8</sub>   |                          |        |                          |        |
| CHL                                  | 5.44/ 4.89           | 479.1233       | 479.1216          | 3.62  | C <sub>22</sub> H <sub>23</sub> ClN <sub>2</sub> O <sub>8</sub> |                          |        |                          |        |
| <b>Oxidation Product 1 (-14 Da)</b>  |                      |                |                   |       |                                                                 |                          |        |                          |        |
| D1                                   | 5.50                 | 431.1454       | 431.1449          | 1.18  | C <sub>21</sub> H <sub>22</sub> N <sub>2</sub> O <sub>8</sub>   | x                        |        | x                        |        |
| O1                                   | 4.48                 | 447.1403       | 447.1398          | 1.11  | C <sub>21</sub> H <sub>22</sub> N <sub>2</sub> O <sub>9</sub>   | x                        |        | x                        |        |
| T1                                   | 4.45/ (4.19)         | 431.1454       | 431.1449          | 1.18  | C <sub>21</sub> H <sub>22</sub> N <sub>2</sub> O <sub>8</sub>   | x                        |        | x                        |        |
| C1                                   | 5.23                 | 465.1059       | 465.1059          | -0.04 | C <sub>21</sub> H <sub>21</sub> ClN <sub>2</sub> O <sub>8</sub> | x                        |        | x                        |        |
| <b>Oxidation Product 2 (+ 16 Da)</b> |                      |                |                   |       |                                                                 |                          |        |                          |        |
| D2                                   | 4.79                 | 461.1582       | 461.1555          | 5.96  | C <sub>22</sub> H <sub>24</sub> N <sub>2</sub> O <sub>9</sub>   |                          | x      |                          | x      |
| O2                                   | 3.92                 | 477.1504       | 477.1504          | 0.06  | C <sub>22</sub> H <sub>24</sub> N <sub>2</sub> O <sub>10</sub>  |                          | x      |                          | x      |
| T2                                   | 4.54/ (4.06)/(3.80)  | 461.1554       | 461.1555          | -0.12 | C <sub>22</sub> H <sub>24</sub> N <sub>2</sub> O <sub>9</sub>   |                          | x      |                          | x      |
| C2                                   | 5.68                 | 495.1164       | 495.1165          | -0.17 | C <sub>22</sub> H <sub>23</sub> ClN <sub>2</sub> O <sub>9</sub> |                          | x      |                          | x      |
| <b>Oxidation Product 3 (+ 14 Da)</b> |                      |                |                   |       |                                                                 |                          |        |                          |        |
| D3                                   | 5.01 / 5.91          | 459.1399       | 459.1398          | 0.2   | C <sub>22</sub> H <sub>22</sub> N <sub>2</sub> O <sub>9</sub>   |                          | x      |                          | x      |
| O3                                   | 4.65                 | 475.1348       | 475.1347          | 0.17  | C <sub>22</sub> H <sub>22</sub> N <sub>2</sub> O <sub>10</sub>  |                          | x      |                          | x      |
| T3                                   | 4.98                 | 459.1404       | 459.1398          | 1.29  | C <sub>22</sub> H <sub>22</sub> N <sub>2</sub> O <sub>9</sub>   |                          | x      |                          | x      |
| C3                                   | 5.68                 | 493.1011       | 493.1008          | 0.54  | C <sub>22</sub> H <sub>21</sub> ClN <sub>2</sub> O <sub>9</sub> |                          | x      |                          | x      |

## Figures

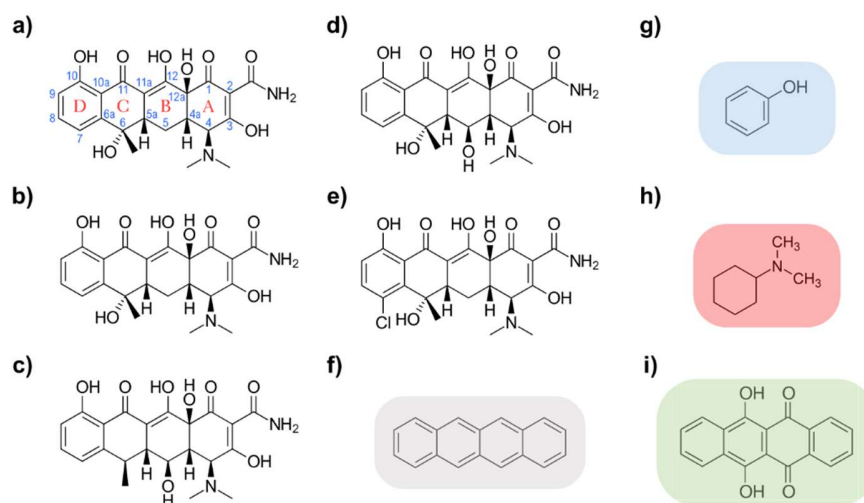

**Figure S1.** **a)** Skeletal formula of tetracycline with atoms and four rings numbered and labeled. Chemical structure of the tetracycline antibiotics studied in this work: **b)** TET, **c)** DOXY, **d)** OXY and **e)** CHL; and the chemical compounds used to verify the oxidation peaks along the electrochemical fingerprints in the pH screening: **f)** naphthalene core, **g)** phenol, **h)** N,N-dimethylcyclohexylamine and **i)** 6,11-dihydroxy-5,12-naphthacenedione.

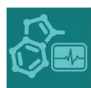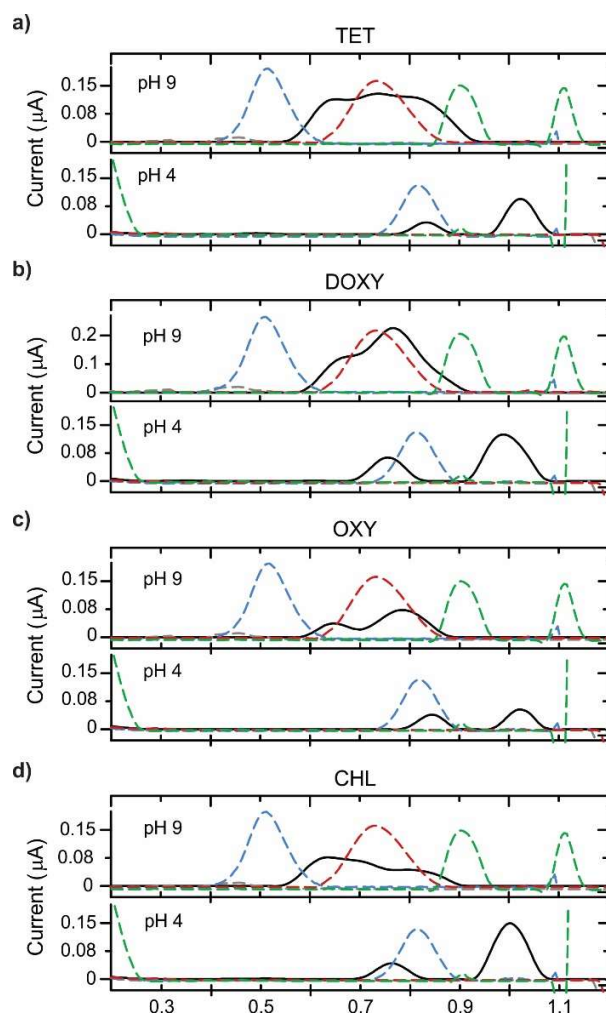

**Figure S2.** Square wave voltammograms (baseline-corrected) obtained at pH 4 and 9 of Britton Robinson buffer of all TCs (black line) **a)** TET, **b)** DOXY, **c)** OXY and **d)** CHL at 10  $\mu\text{M}$  concentration each. Phenol (blue dashed line), benz[b]anthracene (grey dashed line) and N,N-dimethylcyclohexylamine (red dashed line) in a concentration of 10  $\mu\text{M}$  and 6,11-dihydroxy-5,12-naphthacenedione (green dashed line) in a concentration of 1 mM.

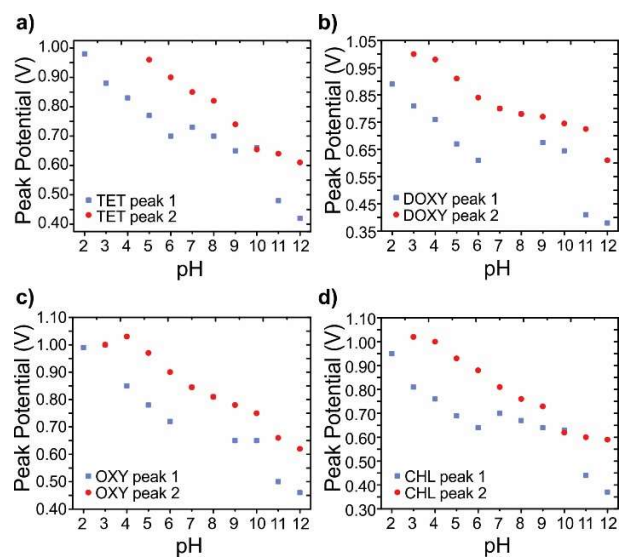

**Figure S3.** Peak potential of the first peak (in blue squares) and second peak (red circles) *versus* pH of **a)** TET, **b)** DOXY, **c)** OXY and **d)** CHL. The third peak is not included due to its less evident presence within the pH range.

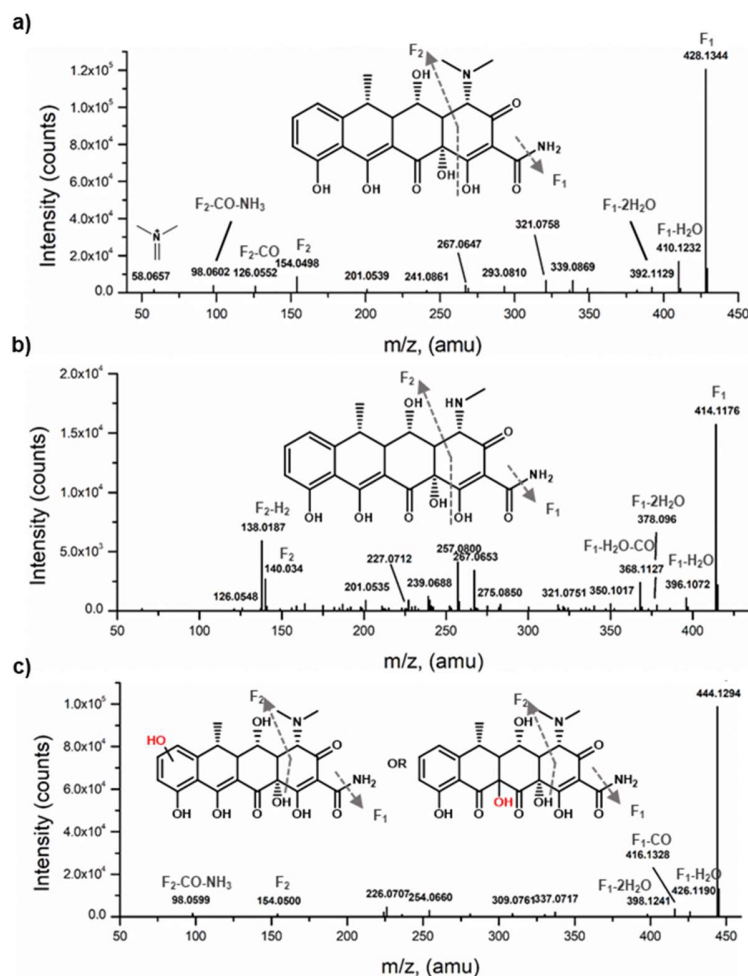

**Figure S4.** MS/MS spectra of **a)** DOXY ( $m/z$  445.1650,  $C_{22}H_{24}N_2O_8$ ), **b)** oxidation product D1 ( $m/z$  431.1454,  $C_{21}H_{22}N_2O_8$ ), **c)** oxidation product D2 ( $m/z$  461.1558,  $C_{22}H_{24}N_2O_9$ ).

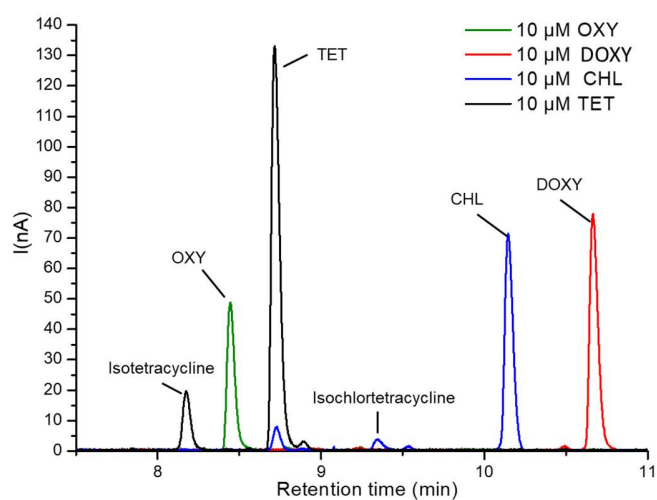

**Figure S5.** HPLC-ECD chromatograms of 10  $\mu$ M TET (black), CHL (blue), OXY (green) and DXC (red) at 1.0 V.

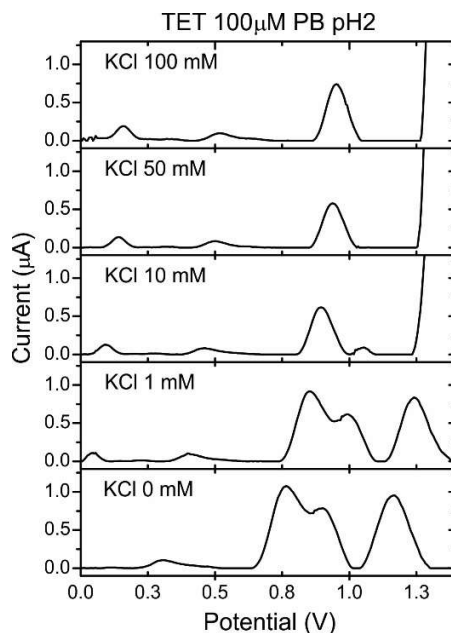

**Figure S6.** Electrochemical influence of the supporting electrolyte (concentration of 0, 1, 10, 50 and 100 mM) at pH 2 using a solution of tetracycline (TET) 100  $\mu$ M in phosphate buffer (PB).

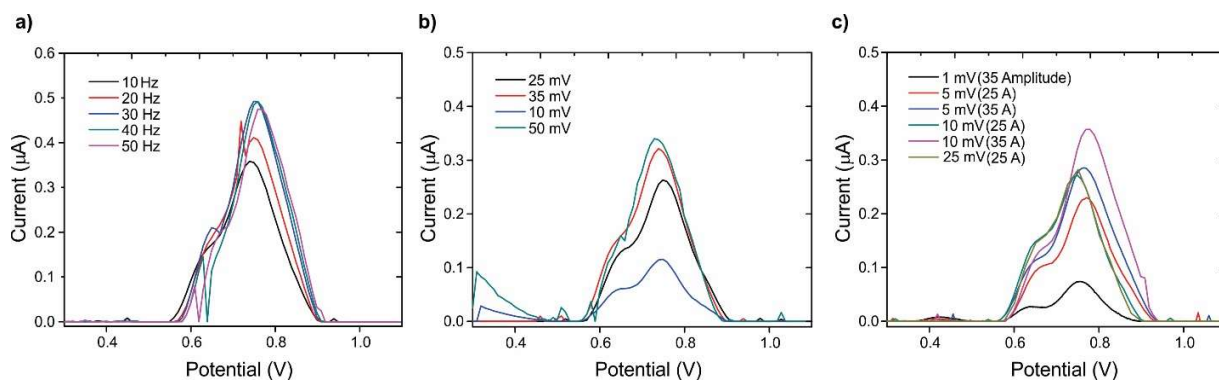

**Figure S7.** Optimization of the main parameters used in square wave voltammetry: **a)** Frequency (Hz), **b)** Amplitude (mV) and **c)** step potential (mV). The step potential was compared with regard to the best options of amplitude (25 and 35 mV) in order to select the optimal option.

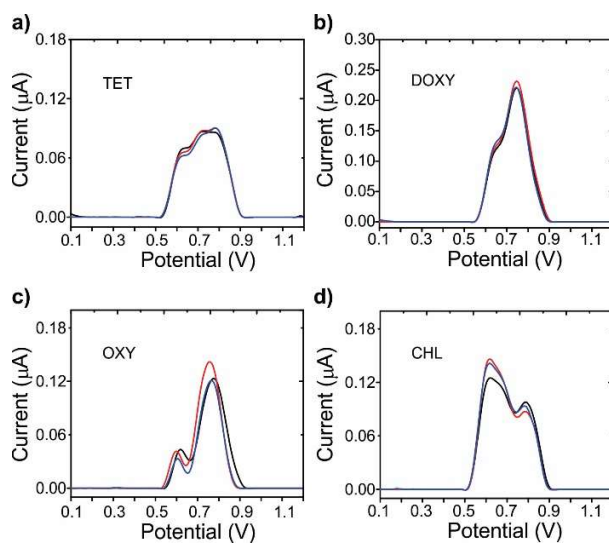

**Figure S8.** Reproducibility study (N=3) by square wave voltammetry (baseline-corrected) of each tetracycline 10  $\mu\text{M}$  concentration at pH 9, **a)** TET, **b)** DOXY, **c)** OXY and **d)** CHL.

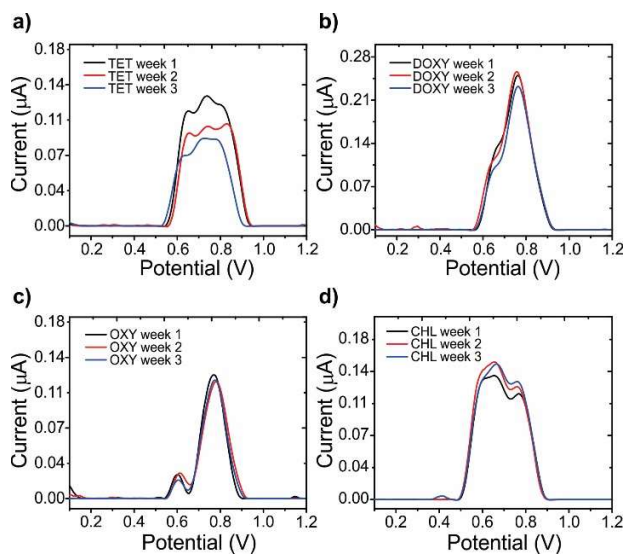

**Figure S9.** Stability of the different stocks solutions with time (after 1, 2 and 3 weeks) **a)** TET, **b)** DOXY, **c)** OXY and **d)** CHL.



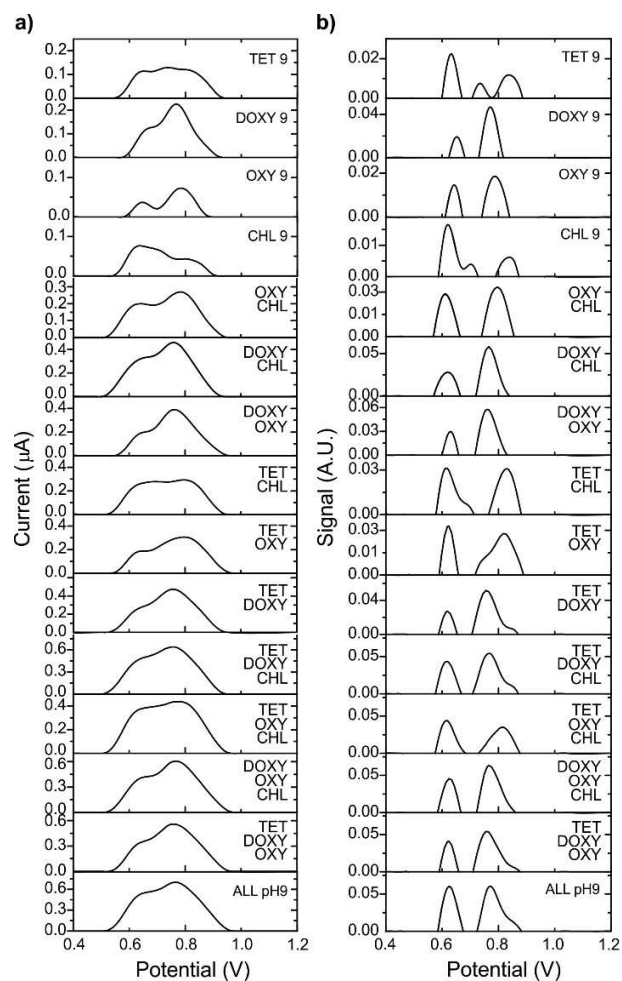

**Figure S10.** Data treatment with Matlab script to improve peak separation/identification at pH 9 for single TCs and all combination in mixtures of TCs **a)** square wave voltammetry from raw data (corrected by moving average) and **b)** output signal after the application of the script.

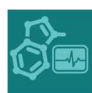

## References

1. Liu, X.; Huang, D.; Lai, C.; Zeng, G.; Qin, L.; Zhang, C.; Yi, H.; Li, B.; Deng, R.; Liu, S.; et al. Recent advances in sensors for tetracycline antibiotics and their applications. *TrAC - Trends Anal. Chem.* **2018**, *109*, 260–274, doi:10.1016/j.trac.2018.10.011.
2. Oka, H.; Ito, Y.; Matsumoto, H. Chromatographic analysis of tetracycline antibiotics in foods. *J. Chromatogr. A* **2000**, *882*, 109–133, doi:10.1016/S0021-9673(99)01316-3.
3. Pastor-Navarro, N.; Morais, S.; Maquieira, Á.; Puchades, R. Synthesis of haptens and development of a sensitive immunoassay for tetracycline residues. Application to honey samples. *Anal. Chim. Acta* **2007**, *594*, 211–218, doi:10.1016/j.aca.2007.05.045.
4. Piaopiao, C.; Yichen, X.; Xiaoxiao, C.; Shan, Z.; Yang, L.; Chaobiao, H. A “Signal On” Photoelectrochemical Aptasensor For Tetracycline Detection Based On Semiconductor Polymer Quantum Dots. *J. Electrochemical Soc.* **2020**, *167*, 067516, doi:10.1149/1945-7111/ab818a.
5. Zarei, M. Sensitive visible light-driven photoelectrochemical aptasensor for detection of tetracycline using  $\text{ZrO}_2/\text{g-C}_3\text{N}_4$  nanocomposite. *Sensors Int.* **2020**, *1*, 100029, doi:10.1016/j.sintl.2020.100029.
6. Yang, Y.; Yan, W.; Guo, Y.; Wang, X.; Zhang, F.; Yu, L.; Guo, C.; Fang, G. Sensitive and selective electrochemical aptasensor via diazonium-coupling reaction for label-free determination of oxytetracycline in milk samples. *Sensors and Actuators Reports* **2020**, *2*, 100009, doi:10.1016/j.snr.2020.100009.
7. Hu, X.; Xu, Y.; Cui, X.; Li, W.; Huang, X.; Li, Z.; Shi, J.; Zou, X. Fluorometric and electrochemical dual-mode nanoprobe for tetracycline by using a nanocomposite prepared from carbon nitride quantum dots and silver nanoparticles. *Microchim. Acta* **2020**, *187*, 1–10.
8. Wu, Y.; Bi, H.; Ning, G.; Xu, Z.; Liu, G.; Wang, Y.; Zhao, Y. Cyclodextrin subject-object recognition-based aptamer sensor for sensitive and selective detection of tetracycline. *J. Solid State Electrochem.* **2020**, *24*, 2365–2372.
9. Pizan-Aquino, C.; Wong, A.; Aviles-Felix, L.; Sotomayor, M.D.P.T. Evaluation of the performance of selective M-MIP to tetracycline using electrochemical and HPLC-UV method. *Mater. Chem. Phys.* **2020**, *245*, 122777, doi:10.1016/j.matchemphys.2020.122777.
10. Wang, S.; Ma, R.; Mazzu, Y.Z.; Zhang, J.; Li, W.; Tan, L.; Zhou, L.-D.; Xia, Z.-N.; Zhang, Q.-H.; Yuan, C.-S. Specific adsorption of tetracycline from milk by using biocompatible magnetic molecular imprinting material and evaluation by ECD. *Food Chem.* **2020**, *326*, 126969, doi:10.1016/j.foodchem.2020.126969.
11. Jampasa, S.; Pummoree, J.; Siangproh, W.; Khongchareonporn, N.; Bgamrojanavanich, N.; Chailapakul, O.; Chaiyo, S. Chemical “Signal-On” electrochemical biosensor based on a competitive immunoassay format for the sensitive determination of oxytetracycline. *Sensors Actuators B. Chem.* **2020**, *320*, 128389, doi:10.1016/j.snb.2020.128389.
12. Starzec, K.; Cristea, C.; Tertis, M.; Feier, B.; Wieczorek, M.; Koscielniak, P.; Kochana, J. Employment of electrostriction phenomenon for label-free electrochemical immunosensing of tetracycline. *Bioelectrochemistry*



- 2020, 132, 107405, doi:10.1016/j.bioelechem.2019.107405.
13. Prusty, A.K.; Bhand, S. A capacitive immunosensor for tetracycline estimation using antibody modified polytyramine-alkanethiol ultra-thin film on gold. *J. Electroanal. Chem.* **2020**, *863*, 114055, doi:10.1016/j.jelechem.2020.114055.
  14. Rouhbakhsh, Z.; Verdian, A.; Rajabzadeh, G. Design of a liquid crystal-based aptasensing platform for ultrasensitive detection of tetracycline. *Talanta* **2020**, *206*, 120246, doi:10.1016/j.talanta.2019.120246.
  15. Alawad, A.; Istamboulié, G.; Calas-Blanchard, C.; Noguer, T. A reagentless aptasensor based on intrinsic aptamer redox activity for the detection of tetracycline in water. *Sensors Actuators, B Chem.* **2019**, *288*, 141–146, doi:10.1016/j.snb.2019.02.103.
  16. Feng, Y.; Yan, T.; Wu, T.; Zhang, N.; Yang, Q.; Sun, M.; Yan, L.; Du, B.; Wei, Q. A label-free photoelectrochemical aptasensing platform base on plasmon Au coupling with MOF-derived In<sub>2</sub>O<sub>3</sub>@g-C<sub>3</sub>N<sub>4</sub> nanoarchitectures for tetracycline detection. *Sensors Actuators, B Chem.* **2019**, *298*, 126817, doi:10.1016/j.snb.2019.126817.
  17. Devkota, L.; Nguyen, L.T.; Vu, T.T.; Piro, B. Electrochemical determination of tetracycline using AuNP-coated molecularly imprinted overoxidized polypyrrole sensing interface. *Electrochim. Acta* **2018**, *270*, 535–542, doi:10.1016/j.electacta.2018.03.104.
  18. Benvidi, A.; Yazdanparast, S.; Rezaeinasab, M.; Tezerjani, M.D.; Abbasi, S. Designing and fabrication of a novel sensitive electrochemical aptasensor based on poly (L-glutamic acid)/MWCNTs modified glassy carbon electrode for determination of tetracycline. *J. Electroanal. Chem.* **2018**, *808*, 311–320, doi:10.1016/j.jelechem.2017.12.032.
  19. Yang, C.; Bie, J.; Zhang, X.; Yan, C.; Li, H.; Zhang, M.; Su, R.; Zhang, X.; Sun, C. A label-free aptasensor for the detection of tetracycline based on the luminescence of SYBR Green I. *Spectrochim. Acta - Part A Mol. Biomol. Spectrosc.* **2018**, *202*, 382–388, doi:10.1016/j.saa.2018.05.075.
  20. Tang, Y.; Liu, P.; Xu, J.; Li, L. Le; Yang, L.; Liu, X.; Liu, S.; Zhou, Y. Electrochemical aptasensor based on a novel flower-like TiO<sub>2</sub> nanocomposite for the detection of tetracycline. *Sensors Actuators, B Chem.* **2018**, *258*, 906–912, doi:10.1016/j.snb.2017.11.071.
  21. Han, Q.; Wang, R.; Xing, B.; Chi, H.; Wu, D.; Wei, Q. Label-free photoelectrochemical aptasensor for tetracycline detection based on cerium doped CdS sensitized BiYWO<sub>6</sub>. *Biosens. Bioelectron.* **2018**, *106*, 7–13, doi:10.1016/j.bios.2018.01.051.
  22. Wang, S.; Dong, Y.; Liang, X. Development of a SPR aptasensor containing oriented aptamer for direct capture and detection of tetracycline in multiple honey samples. *Biosens. Bioelectron.* **2018**, *109*, 1–7, doi:10.1016/j.bios.2018.02.051.
  23. Xu, Q.; Liu, Z.; Fu, J.; Zhao, W.; Guo, Y.; Sun, X.; Zhang, H. Ratiometric electrochemical aptasensor based on ferrocene and carbon nanofibers for highly specific detection of tetracycline residues. *Sci. Rep.* **2017**, *7*, 2–11, doi:10.1038/s41598-017-15333-5.



24. Shi, Z.; Hou, W.; Jiao, Y.; Guo, Y.; Sun, X.; Zhao, J.; Wang, X. Ultra-sensitive aptasensor based on IL and Fe<sub>3</sub>O<sub>4</sub> nanoparticles for tetracycline detection. *Int. J. Electrochem. Sci.* **2017**, *12*, 7426–7434, doi:10.20964/2017.08.76.
25. Krepper, G.; Pierini, G.D.; Pistonesi, M.F.; Di Nezio, M.S. “In-situ” antimony film electrode for the determination of tetracyclines in Argentinean honey samples. *Sensors Actuators, B Chem.* **2017**, *241*, 560–566, doi:10.1016/j.snb.2016.10.125.
26. Le, T.H.; Pham, V.P.; La, T.H.; Phan, T.B.; Le, Q.H. Electrochemical aptasensor for detecting tetracycline in milk. *Adv. Nat. Sci. Nanosci. Nanotechnol.* **2016**, *7*, doi:10.1088/2043-6262/7/1/015008.
27. Benvidi, A.; Tezerjani, M.D.; Moshtaghiun, S.M.; Mazloun-Ardakani, M. An aptasensor for tetracycline using a glassy carbon modified with nanosheets of graphene oxide. *Microchim. Acta* **2016**, *183*, 1797–1804, doi:10.1007/s00604-016-1810-y.
28. Liu, X.; Zheng, S.; Hu, Y.; Li, Z.; Luo, F.; He, Z. Electrochemical Immunosensor Based on the Chitosan-Magnetic Nanoparticles for Detection of Tetracycline. *Food Anal. Methods* **2016**, *9*, 2972–2978, doi:10.1007/s12161-016-0480-z.
29. Zhan, X.; Hu, G.; Wagberg, T.; Zhan, S.; Xu, H.; Zhou, P. Electrochemical aptasensor for tetracycline using a screen-printed carbon electrode modified with an alginate film containing reduced graphene oxide and magnetite (Fe<sub>3</sub>O<sub>4</sub>) nanoparticles. *Microchim. Acta* **2016**, *183*, 723–729, doi:10.1007/s00604-015-1718-y.
30. Jahanbani, S.; Benvidi, A. Comparison of two fabricated aptasensors based on modified carbon paste/oleic acid and magnetic bar carbon paste/Fe<sub>3</sub>O<sub>4</sub>@oleic acid nanoparticle electrodes for tetracycline detection. *Biosens. Bioelectron.* **2016**, *85*, 553–562, doi:10.1016/j.bios.2016.05.052.
31. Taghdisi, S.M.; Danesh, N.M.; Ramezani, M.; Abnous, K. A novel M-shape electrochemical aptasensor for ultrasensitive detection of tetracyclines. *Biosens. Bioelectron.* **2016**, *85*, 509–514, doi:10.1016/j.bios.2016.05.048.
32. Wong, A.; Scontri, M.; Materon, E.M.; Lanza, M.R.V.; Sotomayor, M.D.P.T. Development and application of an electrochemical sensor modified with multi-walled carbon nanotubes and graphene oxide for the sensitive and selective detection of tetracycline. *J. Electroanal. Chem.* **2015**, *757*, 250–257, doi:10.1016/j.jelechem.2015.10.001.
33. Guo, Y.; Wang, X.; Sun, X. A label-free electrochemical aptasensor based on electrodeposited gold nanoparticles and methylene blue for tetracycline detection. *Int. J. Electrochem. Sci.* **2015**, *10*, 3668–3679.
34. Liu, Y.; Yan, K.; Zhang, J. Graphitic carbon nitride sensitized with CdS quantum dots for visible-light-driven photoelectrochemical aptasensing of tetracycline. *ACS Appl. Mater. Interfaces* **2015**, *2015*, doi:10.1021/acsami.5b08275.
35. Luo, Y.; Xu, J.; Li, Y.; Gao, H.; Guo, J.; Shen, F.; Sun, C. A novel colorimetric aptasensor using cysteamine-stabilized gold nanoparticles as probe for rapid and specific detection of tetracycline in raw milk. *Food Control* **2015**, *54*, 7–15, doi:10.1016/j.foodcont.2015.01.005.
36. Ramezani, M.; Mohammad Danesh, N.; Lavaee, P.; Abnous, K.; Mohammad Taghdisi, S. A novel colorimetric



- triple-helix molecular switch aptasensor for ultrasensitive detection of tetracycline. *Biosens. Bioelectron.* **2015**, *70*, 181–187, doi:10.1016/j.bios.2015.03.040.
37. Wang, S.; Liu, J.; Yong, W.; Chen, Q.; Zhang, L.; Dong, Y.; Su, H.; Tan, T. A direct competitive assay-based aptasensor for sensitive determination of tetracycline residue in Honey. *Talanta* **2015**, *131*, 562–569, doi:10.1016/j.talanta.2014.08.028.
38. Liu, B.; Zhang, B.; Chen, G.; Tang, D. Biotin-avidin-conjugated metal sulfide nanoclusters for simultaneous electrochemical immunoassay of tetracycline and chloramphenicol. *Microchim. Acta* **2014**, *181*, 257–262, doi:10.1007/s00604-013-1096-2.
39. Wang, S.; Yong, W.; Liu, J.; Zhang, L.; Chen, Q.; Dong, Y. Development of an indirect competitive assay-based aptasensor for highly sensitive detection of tetracycline residue in honey. *Biosens. Bioelectron.* **2014**, *57*, 192–198, doi:10.1016/j.bios.2014.02.032.
40. Chen, D.; Yao, D.; Xie, C.; Liu, D. Development of an aptasensor for electrochemical detection of tetracycline. *Food Control* **2014**, *42*, 109–115, doi:10.1016/j.foodcont.2014.01.018.
41. Shen, G.; Guo, Y.; Sun, X.; Wang, X. Electrochemical Aptasensor Based on Prussian Blue-Chitosan-Glutaraldehyde for the Sensitive Determination of Tetracycline. *Nano-Micro Lett.* **2014**, *6*, 143–152, doi:10.1007/BF03353778.
42. Que, X.; Chen, X.; Fu, L.; Lai, W.; Zhuang, J.; Chen, G.; Tang, D. Platinum-catalyzed hydrogen evolution reaction for sensitive electrochemical immunoassay of tetracycline residues. *J. Electroanal. Chem.* **2013**, *704*, 111–117, doi:10.1016/j.jelechem.2013.06.023.
43. Conzuelo, F.; Gamella, M.; Campuzano, S.; Reviejo, A.J.; Pingarrón, J.M. Disposable amperometric magneto-immunosensor for direct detection of tetracyclines antibiotics residues in milk. *Anal. Chim. Acta* **2012**, *737*, 29–36, doi:10.1016/j.aca.2012.05.051.
44. Faridah, S.; Azura, N.; Hazana, R.; A.R, G.; Norzaili, Z.; Azima, A.; Zamri, I. Electrochemical sensors for detection of tetracycline antibiotics Unbound free tetracycline and tetracycline conjugates were removed during the washing step Direct competitive ELISA method Carbon working electrode was connected to the electrochemical ayse. *Malaysia Soc. Anim. Prod.* **2012**, *15*, 67–80.
45. Zhang, J.; Wu, Y.; Zhang, B.; Li, M.; Jia, S.; Jiang, S.; Zhou, H.; Zhang, Y.; Zhang, C.; Turner, A.P.F. Label-Free Electrochemical Detection of Tetracycline by an Aptamer Nano-Biosensor. *Anal. Lett.* **2012**, *45*, 986–992, doi:10.1080/00032719.2012.670784.
46. Zhou, L.; Li, D.J.; Gai, L.; Wang, J.P.; Li, Y. Bin Electrochemical aptasensor for the detection of tetracycline with multi-walled carbon nanotubes amplification. *Sensors Actuators, B Chem.* **2012**, *162*, 201–208, doi:10.1016/j.snb.2011.12.067.
47. Wang, H.; Zhao, H.; Quan, X.; Chen, S. Electrochemical Determination of Tetracycline Using Molecularly Imprinted Polymer Modified Carbon Nanotube-Gold Nanoparticles Electrode. *Electroanalysis* **2011**, *23*, 1863–1869, doi:10.1002/elan.201100049.



48. Kim, Y.J.; Kim, Y.S.; Niazi, J.H.; Gu, M.B. Electrochemical aptasensor for tetracycline detection. *Bioprocess Biosyst. Eng.* **2010**, *33*, 31–37, doi:10.1007/s00449-009-0371-4.
49. Jeon, M.; Kim, J.; Paeng, K.J.; Park, S.W.; Paeng, I.R. Biotin-avidin mediated competitive enzyme-linked immunosorbent assay to detect residues of tetracyclines in milk. *Microchem. J.* **2008**, *88*, 26–31, doi:10.1016/j.microc.2007.09.001.
50. Zhang, Y.; Lu, S.; Liu, W.; Zhao, C.; Xi, R. Preparation of anti-tetracycline antibodies and development of an indirect heterologous competitive enzyme-linked immunosorbent assay to detect residues of tetracycline in milk. *J. Agric. Food Chem.* **2007**, *55*, 211–218, doi:10.1021/jf062627s.
51. Mohammad-Razdari, A.; Ghasemi-Varnamkhasti, M.; Rostami, S.; Izadi, Z.; Ensafi, A.A.; Siadat, M. Development of an electrochemical biosensor for impedimetric detection of tetracycline in milk. *J. Food Sci. Technol.* **2020**, *57*, 4697–4706, doi:10.1007/s13197-020-04506-2.
52. Lorenzetti, A.S.; Sierra, T.; Domini, C.E.; Lista, A.G.; Crevillen, A.G.; Escarpa, A. Electrochemically Reduced Graphene Oxide-Based Screen-Printed Electrodes for Total Tetracycline Determination by Adsorptive Transfer Stripping. *Sensors* **2020**, *20*, 1–12.
53. Abraham, T.; Gigimol, M.G.; Priyanka, R.N.; Susan, M.; Korah, B.K.; Mathew, B. In-situ fabrication of Ag<sub>3</sub>PO<sub>4</sub> based binary composite for the efficient electrochemical sensing of tetracycline. *Mater. Lett.* **2020**, *279*, 128502, doi:10.1016/j.matlet.2020.128502.
54. Allahverdiyeva, S.; Yardim, Y.; Senturk, Z. Electrooxidation of tetracycline antibiotic demeclocycline at unmodified boron-doped diamond electrode and its enhancement determination in surfactant-containing media. *Talanta* **2021**, *223*, 121695, doi:10.1016/j.talanta.2020.121695.
55. Turbale, M.; Moges, A.; Dawit, M.; Amare, M. Adsorptive stripping voltammetric determination of Tetracycline in pharmaceutical capsule formulation using Poly (Malachite green) modified glassy carbon electrode. *Heliyon* **2020**, *6*, e05782, doi:10.1016/j.heliyon.2020.e05782.
56. El Alami El Hassani, N.; Baraket, A.; Boudjaoui, S.; Taveira Tenório Neto, E.; Bausells, J.; El Bari, N.; Bouchikhi, B.; Elaissari, A.; Errachid, A.; Zine, N. Development and application of a novel electrochemical immunosensor for tetracycline screening in honey using a fully integrated electrochemical Bio-MEMS. *Biosens. Bioelectron.* **2019**, *130*, 330–337, doi:10.1016/j.bios.2018.09.052.
57. Calixto, C.M.F.; Cavaleiro, É.T.G. Determination of Tetracycline in Bovine and Breast Milk Using a Graphite–Polyurethane Composite Electrode. *Anal. Lett.* **2017**, *50*, 2323–2334, doi:10.1080/00032719.2017.1283506.
58. Kesavan, S.; Kumar, D.R.; Lee, Y.R.; Shim, J.J. Determination of tetracycline in the presence of major interference in human urine samples using polymelamine/electrochemically reduced graphene oxide modified electrode. *Sensors Actuators, B Chem.* **2017**, *241*, 455–465, doi:10.1016/j.snb.2016.10.091.
59. Kushikawa, R.T.; Silva, M.R.; Angelo, A.C.D.; Teixeira, M.F.S. Construction of an electrochemical sensing platform based on platinum nanoparticles supported on carbon for tetracycline determination. *Sensors*



- Actuators, B Chem.* **2016**, *228*, 207–213, doi:10.1016/j.snb.2016.01.009.
60. Calixto, C.M.F.; Cavaleiro, É.T.G. Determination of Tetracyclines in Bovine and Human Urine using a Graphite-Polyurethane Composite Electrode. *Anal. Lett.* **2015**, *48*, 1454–1464, doi:10.1080/00032719.2014.984194.
61. Gan, T.; Shi, Z.; Sun, J.; Liu, Y. Simple and novel electrochemical sensor for the determination of tetracycline based on iron/zinc cations-exchanged montmorillonite catalyst. *Talanta* **2014**, *121*, 187–193, doi:10.1016/j.talanta.2014.01.002.
62. Asadollahi-Baboli, M.; Mani-Varnosfaderani, A. Rapid and simultaneous determination of tetracycline and cefixime antibiotics by mean of gold nanoparticles-screen printed gold electrode and chemometrics tools. *Meas. J. Int. Meas. Confed.* **2014**, *47*, 145–149, doi:10.1016/j.measurement.2013.08.029.
63. Conzuelo, F.; Campuzano, S.; Gamella, M.; Pinacho, D.G.; Reviejo, A.J.; Marco, M.P.; Pingarrón, J.M. Integrated disposable electrochemical immunosensors for the simultaneous determination of sulfonamide and tetracycline antibiotics residues in milk. *Biosens. Bioelectron.* **2013**, *50*, 100–105, doi:10.1016/j.bios.2013.06.019.
64. Calixto, C.M.F.; Cervini, P.; Cavaleiro, É.T.G. Determination of tetracycline in environmental water samples at a graphite-polyurethane composite electrode. *J. Braz. Chem. Soc.* **2012**, *23*, 938–943, doi:10.1590/S0103-50532012000500020.
65. Wang, H.; Zhao, H.; Quan, X. Gold modified microelectrode for direct tetracycline detection. *Front. Environ. Sci. Eng. China* **2012**, *6*, 313–319, doi:10.1007/s11783-011-0323-5.
66. Casella, I.G.; Fabio, P. Determination of tetracycline residues by liquid chromatography coupled with electrochemical detection and solid phase extraction. *J. Agric. Food Chem.* **2009**, *57*, 8735–8741, doi:10.1021/jf902086y.
67. Guo, G.; Zhao, F.; Xiao, F.; Zeng, B. Voltammetric determination of tetracycline by using multi-wall carbon nanotube - ionic liquid film coated glassy carbon electrode. *Int. J. Electrochem. Sci.* **2009**, *4*, 1365–1372.
68. Masawat, P.; Slater, J.M. The determination of tetracycline residues in food using a disposable screen-printed gold electrode (SPGE). *Sensors Actuators, B Chem.* **2007**, *124*, 127–132, doi:10.1016/j.snb.2006.12.010.
69. Vega, D.; Agüí, L.; González-Cortés, A.; Yáñez-Sedeño, P.; Pingarrón, J.M. Voltammetry and amperometric detection of tetracyclines at multi-wall carbon nanotube modified electrodes. *Anal. Bioanal. Chem.* **2007**, *389*, 951–958, doi:10.1007/s00216-007-1505-7.
70. Cai, Y. e.; Cai, Y.; Shi, Y.; Mou, S.; Lu, Y. Optimizing the integrated pulsed amperometric multicycle step waveform for the determination of tetracyclines. *J. Chromatogr. A* **2006**, *1118*, 35–40, doi:10.1016/j.chroma.2005.11.091.
71. Tretepvijit, S.; Preechaworapun, A.; Praphairaksit, N.; Chuanuwatanakul, S.; Einaga, Y.; Chailapakul, O. Use of nickel implanted boron-doped diamond thin film electrode coupled to HPLC system for the determination of tetracyclines. *Talanta* **2006**, *68*, 1329–1335, doi:10.1016/j.talanta.2005.07.047.





72. Charoenraks, T.; Chuanuwatanakul, S.; Honda, K.; Yamaguchi, Y.; Chailapakul, O. Analysis of tetracycline antibiotics using HPLC with pulsed amperometric detection. *Anal. Sci.* **2005**, *21*, 241–245, doi:10.2116/analsci.21.241.
73. Pellegrini, G.E.; Carpico, G.; Coni, E. Electrochemical sensor for the detection and presumptive identification of quinolone and tetracycline residues in milk. *Anal. Chim. Acta* **2004**, *520*, 13–18, doi:10.1016/j.aca.2004.04.052.
74. Zhao, F.; Zhang, X.; Gan, Y. Determination of tetracyclines in ovine milk by high-performance liquid chromatography with a coulometric electrode array system. *J. Chromatogr. A* **2004**, *1055*, 109–114, doi:10.1016/j.chroma.2004.08.131.
75. Loetanantawong, B.; Suracheep, C.; Somasundrum, M.; Surareungchai, W. Electrocatalytic Tetracycline Oxidation at a Mixed-Valent Ruthenium Oxide-Ruthenium Cyanide-Modified Glassy Carbon Electrode and Determination of Tetracyclines by Liquid Chromatography with Electrochemical Detection. *Anal. Chem.* **2004**, *76*, 2266–2272, doi:10.1021/ac035085b.
76. Wangfuengkanagul, N.; Siangproh, W.; Chailapakul, O. A flow injection method for the analysis of tetracycline antibiotics in pharmaceutical formulations using electrochemical detection at anodized boron-doped diamond thin film electrode. *Talanta* **2004**, *64*, 1183–1188, doi:10.1016/j.talanta.2004.04.032.
77. Dang, X.; Hu, C.; Wei, Y.; Chen, W.; Hu, S. Sensitivity improvement of the oxidation of tetracycline at acetylene black electrode in the presence of sodium dodecyl sulfate. *Electroanalysis* **2004**, *16*, 1949–1955, doi:10.1002/elan.200403049.
78. Charoenraks, T.; Palaharn, S.; Grudpan, K.; Siangproh, W.; Chailapakul, O. Flow injection analysis of doxycycline or chlortetracycline in pharmaceutical formulations with pulsed amperometric detection. *Talanta* **2004**, *64*, 1247–1252, doi:10.1016/j.talanta.2004.04.036.
79. Agüí, L.; Guzman, A.; Pedrero, M.; Yáñez-Sedeño, P.; Pingarrón, J.M. Voltametric and flow injection determination of oxytetracycline residues in food samples using carbon fiber microelectrodes. *Electroanalysis* **2003**, *15*, 601–607, doi:10.1002/elan.200390075.
80. Palaharn, S.; Charoenraks, T.; Wangfuengkanagul, N.; Grudpan, K.; Chailapakul, O. Flow injection analysis of tetracycline in pharmaceutical formulation with pulsed amperometric detection. *Anal. Chim. Acta* **2003**, *499*, 191–197, doi:10.1016/S0003-2670(03)00948-6.
81. Zhou, J.; Gerhardt, G.C.; Baranski, A.; Cassidy, R. Capillary electrophoresis of some tetracycline antibiotics coupled with reductive fast cyclic voltammetric detection. *J. Chromatogr. A* **1999**, *839*, 193–201, doi:10.1016/S0021-9673(99)00152-1.
82. Kazemifard, A.G.; Moore, D.E. Evaluation of amperometric detection for the liquid-chromatographic determination of tetracycline antibiotics and their common contaminants in pharmaceutical formulations. *J. Pharm. Biomed. Anal.* **1997**, *16*, 689–696, doi:10.1016/S0731-7085(97)00089-7.
83. Oungpipat, W.; Southwell-Keely, P.; Alexander, P.W. Flow injection detection of tetracyclines by electrocatalytic oxidation at a nickel-modified glassy carbon electrode. *Analyst* **1995**, *120*, 1559–1565,



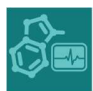

- doi:10.1039/an9952001559.
84. Hou, W.; Wang, E. Liquid chromatographic determination of tetracycline antibiotics at an electrochemically pre-treated glassy carbon electrode. *Analyst* **1989**, *114*, 699–702, doi:10.1039/AN9891400699.
  85. Pinilla Gil, E.; Calvo Blazquez, L.; Garcia-Monco Carra, R.M.; Sanchez Misiego, A. Determination of oxytetracycline in urine and human serum by differential pulse polarography. *Fresenius Zeitschrift für Anal. Chemie* **1989**, *335*, 1002–1004.
  86. Ji, H.; Wang, E. Flow injection amperometric detection based on ion transfer across a water - Solidified nitrobenzene interface for the determination of tetracycline and terramycin. *Analyst* **1988**, *113*, 1541–1543, doi:10.1039/AN9881301541.
  87. Sabharwal, S.; Kishore, K.; Moorthy, P.N. Determination of tetracycline hydrochloride in presence of anhydrotetracycline by differential pulse polarography. *J. Pharm. Sci.* **1988**, *77*, 78–80, doi:10.1002/jps.2600770115.
  88. Pinilla Gil, E.; Calvo Blázquez, L.; García-Moncó Carra, R.M.; Sánchez Misiego, A. Adsorptive stripping voltammetry of oxytetracycline at the hanging mercury drop electrode (HMDE) in acid medium. *Fresenius Zeitschrift für Anal. Chemie* **1988**, *332*, 821–822, doi:10.1007/BF01129787.
  89. Wang, E.; Liu, Y. Cyclic voltammetry and chronopotentiometry with cyclic linear current scanning of terramycin at the water/nitrobenzene interface. *J. Electroanal. Chem.* **1986**, *214*, 459–464, doi:10.1016/0022-0728(86)80114-0.
  90. Chatten, L.G.; Fleischmann, M.; Pletcher, D. THE ANODIC OXIDATION OF SOME TETRACYCLINES. *J. Electroanal. Chem.* **1979**, *102*, 407–413.
